# Supplementary material for: Morphology restrained growth of V2O5 by the oxidation of V-MXenes as a fast diffusion controlled cathode material for aqueous zinc ion batteries
Source: Royal Society of Chemistry journal article supplement (doi:10.1039/d0cc01802c), 2020-01-01
Supplement: d0cc01802c1.pdf [file d0cc01802c1.pdf]

## Electronic Supplementary Information (ESI†)

---

### **Morphology restrained growth of V<sub>2</sub>O<sub>5</sub> by the oxidation of V-MXenes as a fast diffusion controlled cathode material for aqueous Zinc ion batteries**

Mugilan Narayanasamy,<sup>a</sup> Balakrishnan Kirubasankar,<sup>a,b</sup> Minjie Shi,<sup>a</sup> Shanmuganathan Velayutham,<sup>a</sup> Bei Wang,<sup>a</sup> Subramania Angaiah,<sup>b</sup> and Chao Yan,<sup>\*a</sup>

*<sup>a</sup>School of Materials Science and Engineering, Jiangsu University of Science and Technology, Zhenjiang 212003, PR China*

*<sup>b</sup>Electro-Materials Research Laboratory, Centre for Nanoscience and Technology, Pondicherry University, Pondicherry-605 014, India*

*\*Corresponding Author,*

*Prof. Chao Yan    E-mail: [chaoyan@just.edu.cn](mailto:chaoyan@just.edu.cn)*

## **Section S1 Experimental Section**

### **S1.1 Synthesis of $V_2CT_x$**

Initially, the  $V_2AlC$  powder (400 mesh, 98.8%) was purchased from 11 technology Co., Ltd, PR China. 0.5 g of  $V_2AlC$  was slowly added into 15 mL of 40 wt% hydrofluoric acid (HF) solution at 40 °C under magnetic stirring for 24 h to completely exfoliate the Al layers. Subsequently, the obtained  $V_2CT_x$  was washed repeatedly with deionized water until the pH reached  $\sim 7$ . The as-prepared  $V_2CT_x$  was soaked in tetramethylammonium hydroxide (TMAOH) for 18 h at room temperature and centrifugated, dried in vacuum at 60 °C for 7 h.

### **S1.2 Synthesis of $V_2O_5@V_2C$ nanohybrid**

$V_2O_5@V_2C$  nanohybrid was prepared by a simple hydrothermal method. 1 g of  $V_2CT_x$  powder was dispersed in 80 mL of DI water and stirred for 2 h. This solution is transferred to 100 mL Teflon-lined autoclave heated at various temperatures such as 160 °C, 180 °C and 200 °C for 12 h and denoted as V-160 °C, V-180 °C and V-200 °C, respectively. A light yellowish black precipitate was centrifugated with distilled water several times and dried at 70 °C to collect  $V_2O_5@V_2C$  nanohybrid.

### **S1.3 Fabrication of the Half Cells and ZIB**

The working electrodes composed of active materials, acetylene black, and polyvinylidene fluoride (PVDF) binder in a weight ratio of 70:20:10 was intimately mixed in N-methyl-2-pyrrolidone (NMP) to form uniform slurry. Then the casted film (on graphite paper) was kept at 110 °C for 12 h in a vacuum oven to evaporate the solvent. After cooling down to room temperature and cut into circular discs of 15 mm in diameter. The loading mass of the cathode is in the range of 0.6-0.8 mg (average thickness  $\sim 4$   $\mu m$ ). Zn sheet was used as counter and reference electrode. The ZIB (CR2032) was fabricated using the prepared  $V_2O_5@V_2C$  nanohybrid as the positive electrodes and Zn sheet as the negative electrode in

2.5 M ZnSO<sub>4</sub> dissolved in deionized water as the electrolyte and glass microfiber filter membrane used as the separator. Galvanostatic charge/discharge measurements of the coin-type ZIB were carried out using a commercial battery test system (LAND model, CT2001A) in the potential range of 0.2 to 1.4 V at room temperature. Cyclic voltammetry tests were done in the potential range between 0.2 and 1.4 V at different scan rates of 0.5, 1 and 2 mV s<sup>-1</sup>. The electrochemical impedance spectroscopy (EIS) measurements were also carried out in the frequency range of 10<sup>-2</sup> to 10<sup>5</sup> Hz with a perturbation amplitude of 5 mV. The CV and EIS were carried out using an electrochemical analysing equipment (CS350, Electrochemical Workstation, Wuhan Corrtest Instruments Corp., Ltd.).

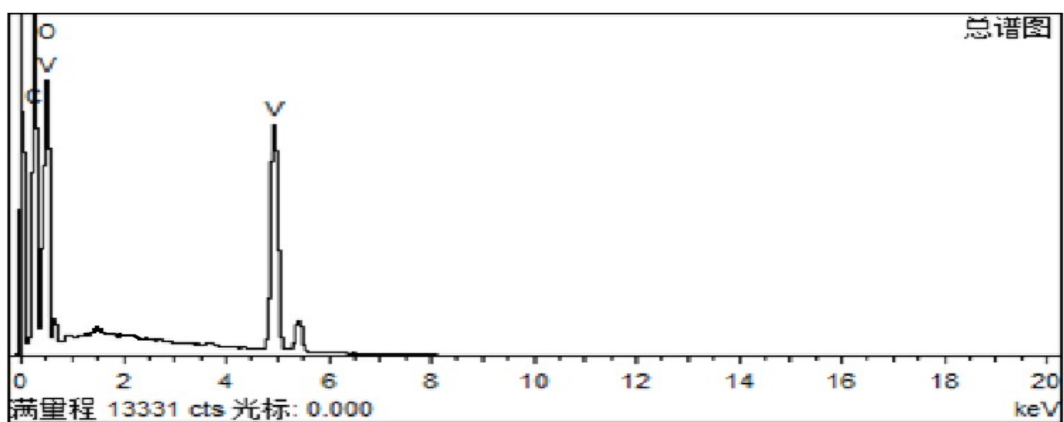

**Fig S1.** EDS representation  $V_2O_5@V_2C$  nanohybrid (V-180°C).

**Table S1.** Elemental distribution of V, O and C elements of  $V_2O_5@V_2C$  nanohybrid at various temperature.

| Element | Pure $V_2C$ (wt. %) | 160 °C (wt. %) | 180 °C (wt. %) | 200 °C (wt. %) |
|---------|---------------------|----------------|----------------|----------------|
| V       | 61.6                | 52.17          | 53.38          | 52.41          |
| C       | 36.51               | 31.3           | 22.15          | 16.64          |
| O       | 1.89                | 16.52          | 24.47          | 30.95          |

The TEM images of V-180 °C are shown in **Fig. S2(a and b)**. Clear  $V_2O_5$  nanorods with an average diameter of  $\sim 80$  nm and some nanorods are formed internally within the stacked structure, which indicates that  $V_2O_5$  grows not only on the surface of V-MXene but also in-between the stacked layers of  $V_2C$  (**Fig. S2a**). **Fig. S2b** presents lattice fringes with interlayer spacings of around 0.34 nm and 0.26 nm which are well-matched with the (110) and (011) planes of  $V_2O_5$ . The crystalline  $V_2C$  lattice fringe also found at top right with a lattice spacing of 0.29 nm corresponds to the (111) plane of  $V_2C$ . These results evidence the growth of  $V_2O_5$  on the surface and interlayers of V-MXene which is well connected with disordered carbons.

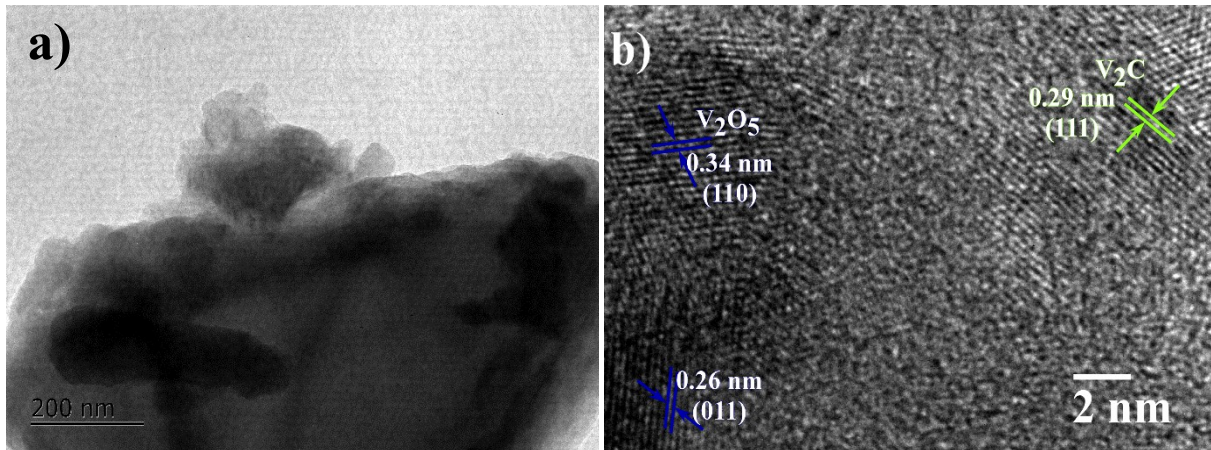

**Fig. S2 (a)** TEM image of V-180°C and **(b)** HR-TEM image of V-180°C.

In **Fig. 3a** all the CV curves of ZIBs exhibits a similar reduction and oxidation peaks, while V-180 °C shows a maximum current density when compared with V-160 °C and V-200 °C based ZIBs. CV curves of V-160 °C and V-200 °C based electrodes possess lower current due to the morphology retained growth of  $V_2O_5$  on stacked layers of  $V_2C$ . In V-160 °C, minimum oxidation occurs and the formation of  $V_2O_5$  is low on  $V_2C$ . Hence, the domination of  $V_2C$  layered structure minimized the electrochemical kinetic of  $Zn^{2+}$  in the host lattice. Whereas in the case of V-200 °C, maximum oxidation occurs, while aggregated thick rods of  $V_2O_5$  formed on  $V_2C$  and stacked layers disappear. Hence, the more  $V_2O_5$  can maximize the electrochemical kinetic of  $Zn^{2+}$  in the host lattice. However, the surface  $V_2O_5$  is thick and crystallite size is higher, which are detrimental to rate of transfer of electron during the kinetic of  $Zn^{2+}$ , tending to possess a lower current density.

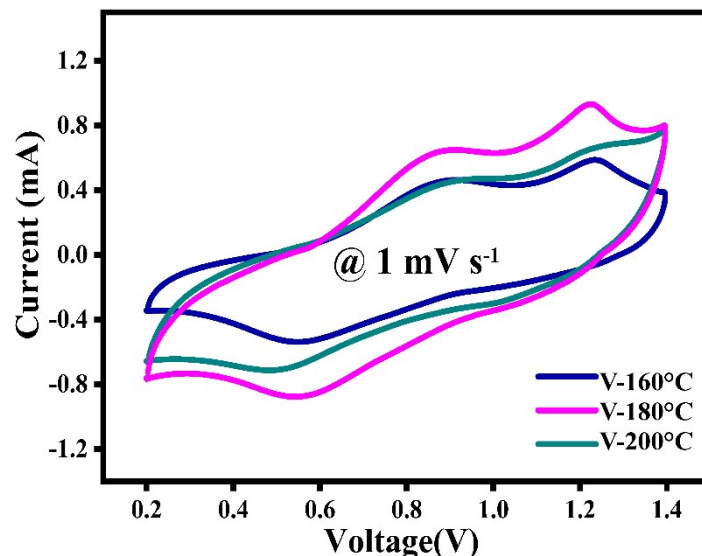

**Fig. 3(a)** CV curves of V-160°C, V-180°C and V-200°C at 1 mVs<sup>-1</sup>.

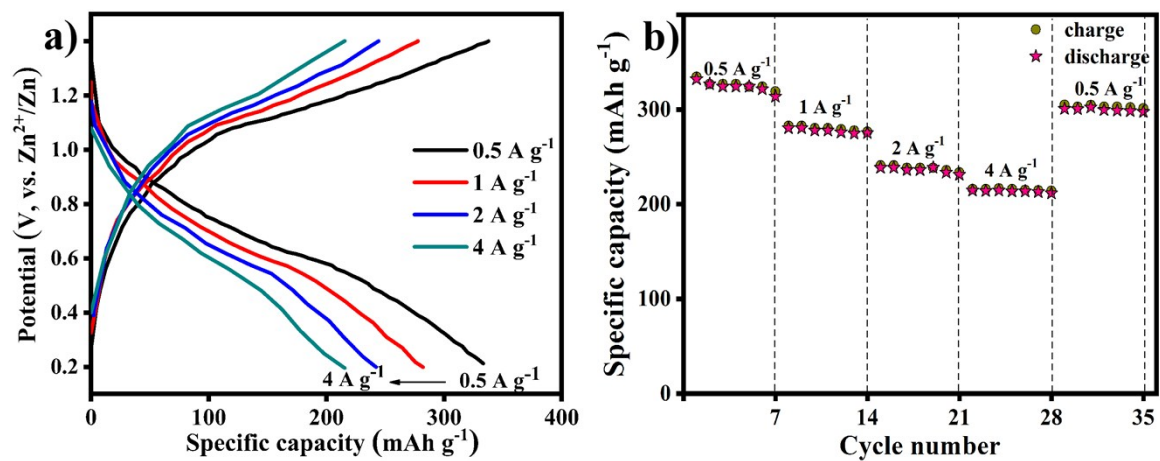

**Fig. S3** (a) V-160°C discharge/charge profiles at various current densities and (b) Rate capability of V-160°C.

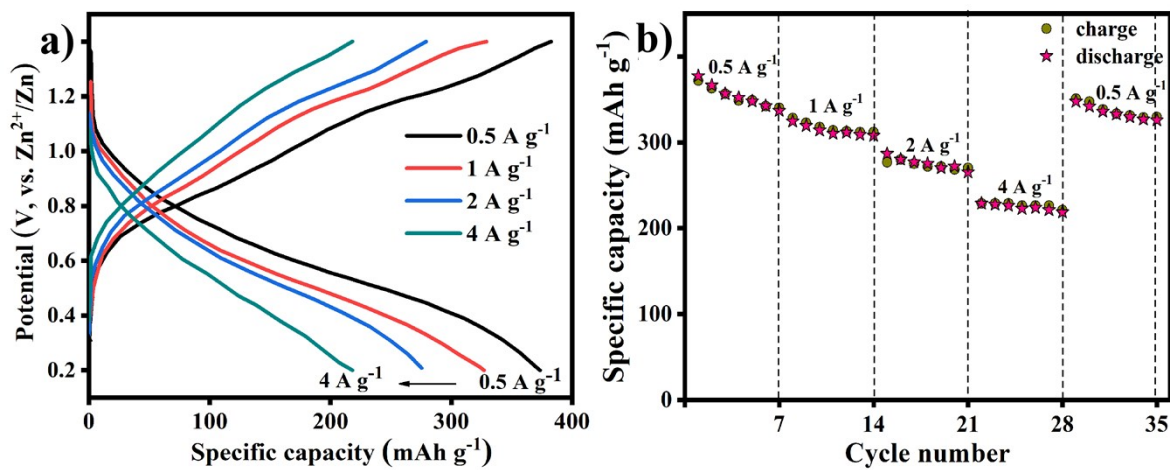

**Fig. S4** (a) V-200°C discharge/charge profiles at various current densities and (b) Rate capability of V-200°C.



The cycle stability of V-180 °C ZIB under a low current density of 0.5 A g<sup>-1</sup> for 100 continuous cycles is shown in **Fig. S5**. A high initial specific capacity of 397 mA h g<sup>-1</sup> is achieved and well maintains upto the first 10 cycles. A gradual decrease is observed in consecutive cycles and still retain a specific capacity of 336 mA h g<sup>-1</sup> even after 100 charge-discharge cycles, which indicates better capacity retention of 84.5% with excellent Coulombic efficiency. Mainly, the gradual decrease during cycling process is due to some trapped Zn<sup>2+</sup> ions into the interior V<sub>2</sub>O<sub>5</sub> on stacked layers of V<sub>2</sub>C structure, which creates low mass transportation of Zn<sup>2+</sup> ions and tends to result in capacity fading.

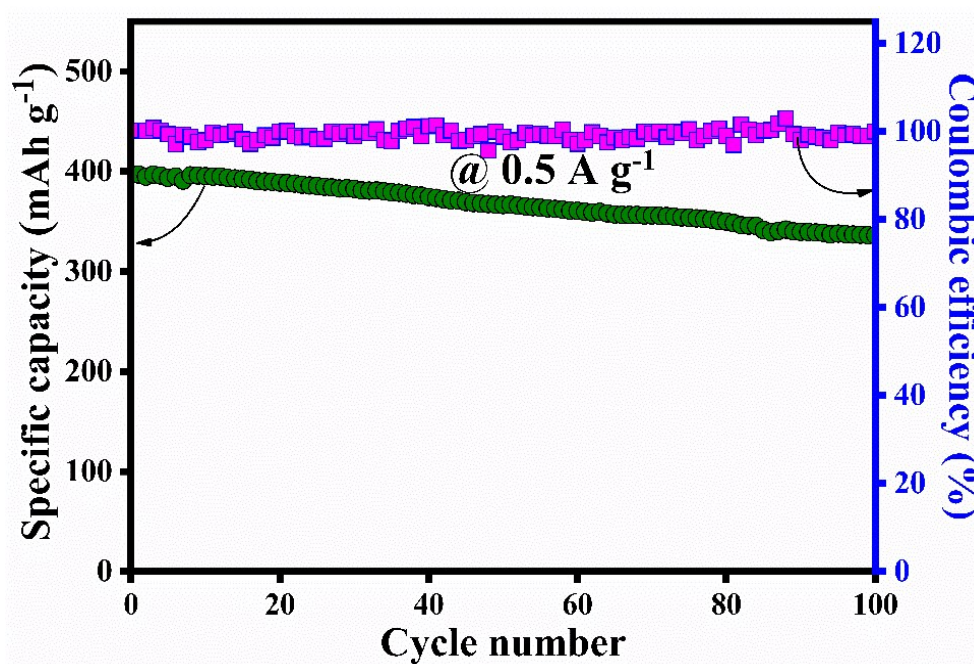

**Fig. S5** Cycling performance of V-180°C based ZIB at 0.5 A g<sup>-1</sup>.

The EIS data is fitted with an equivalent circuit, where  $R_s$  denotes bulk resistance due to electrolyte solution,  $R_{ct}$  represents charge-transfer resistance indicates the insertion of  $Zn^{2+}$  into the  $V_2O_5@V_2C$  nanohybrid, CPE account for constant phase elements due to double-layer capacitance arising from the layered structure of  $V_2C$  by adsorption/desorption of  $Zn^{2+}$  ions,  $W$  indicates the Warburg diffusion resistance due to solid-phase diffusion process of  $Zn^{2+}$ .

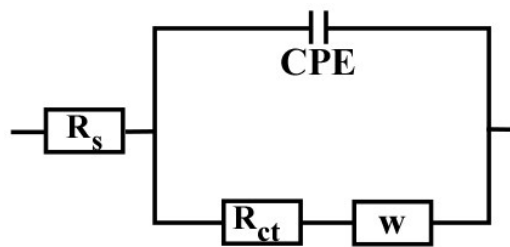

**Fig. S6** Equivalent circuit of Nyquist plots.

**Fig. S7** shows the increases of ( $R_{ct}$ ) charge transfer resistance from 47.8 to 77  $\Omega$  results from slow mass transfer of  $Zn^{2+}$  and the formation of SEI layer during more cycling process.

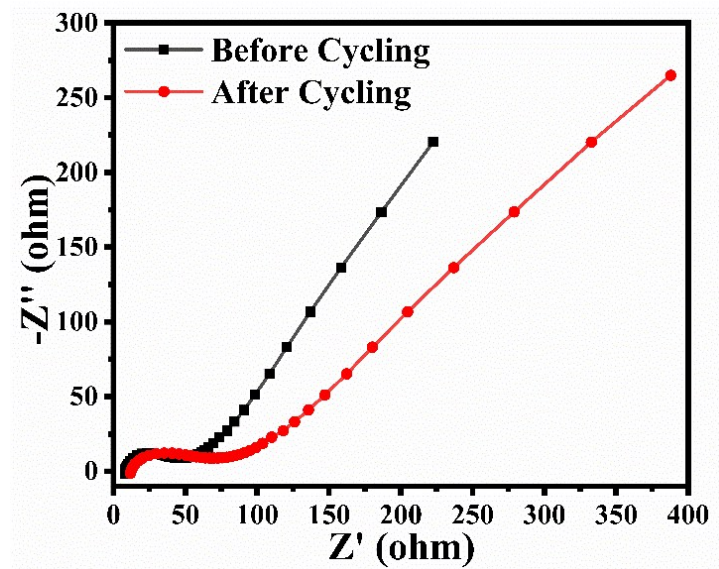

**Fig. S7** Nyquist plots of V-180°C based ZIB before and after cycling.

To prove the stability of the  $V_2O_5@V_2C$  nanohybrid, we provided the XRD and FESEM analysis of the electrode after cycling (**Fig. S8 & S9**), respectively. XRD analyses before and after cycling (**Fig. S8**) were further carried out to verify the phase stability and structural integrity of  $V_2O_5@V_2C$  nanohybrid. It can be clearly observed from the XRD pattern of the electrode after cycling that the characteristic peaks of  $V_2O_5$  and  $V_2C$  still exist, while there appears no other impurity peaks compared with the XRD pattern before the cycling test, suggesting that the  $V_2O_5@V_2C$  nanohybrid electrode maintains its phase purity and structural integrity after repeated cycling in aqueous ZIBs.

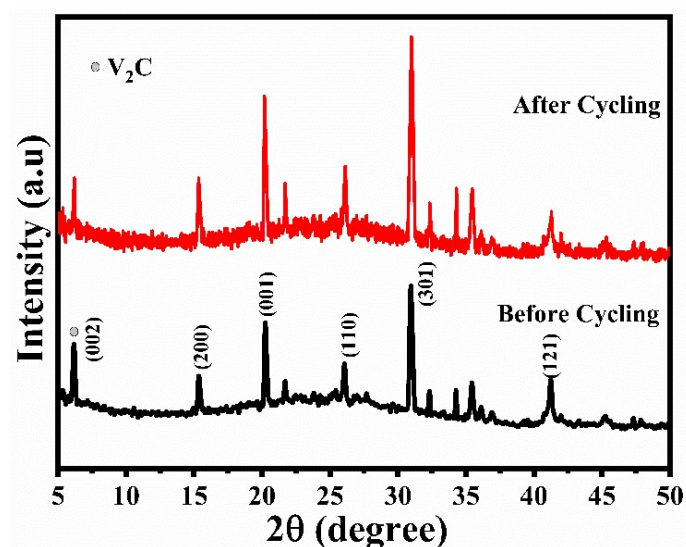

**Fig. S8** XRD patterns of  $V_2O_5@V_2C$  nanohybrid before and after cycling (V-180°C).

**Fig. S9** shows the FESEM image of after cycling. It indicates that there is no obvious structural change or collapse of  $V_2O_5@V_2C$  nano hybrid during repeated charging-discharging processes. The effective confinement of  $V_2O_5$  on  $V_2C$  stacks can greatly inhibit the aggregation and dissolution of  $V_2O_5$  during the cycling processes, rendering the high stability of the  $V_2O_5@V_2C$  nano hybrid on V-180°C electrode for ZIBs.

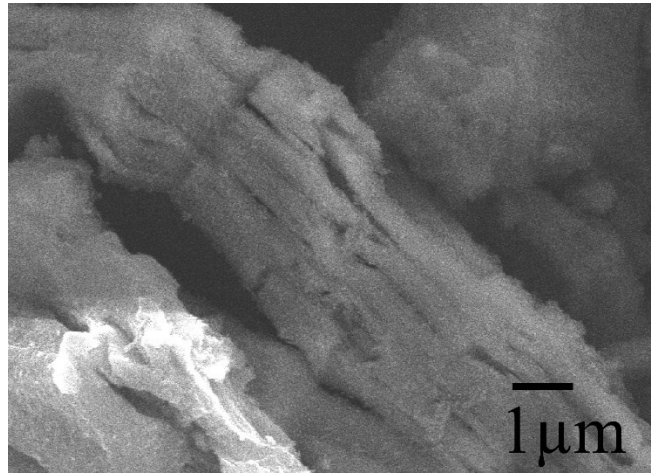

**Fig. S9** FESEM image of  $V_2O_5@V_2C$  nano hybrid electrode after cycling (V-180°C).

**Table S2.** Summary of various kinds of V<sub>2</sub>O<sub>5</sub> and its composite based cathode material for aqueous ZIBs.

| <b>Year of publish</b> | <b>Testing Voltage</b> | <b>Type of V<sub>2</sub>O<sub>5</sub></b>                                     | <b>Electrolyte components</b>                                        | <b>Discharge capacity</b>                              | <b>Capacity Retention</b>                                                                            |
|------------------------|------------------------|-------------------------------------------------------------------------------|----------------------------------------------------------------------|--------------------------------------------------------|------------------------------------------------------------------------------------------------------|
| 2019 <sup>1</sup>      | 0.2 to 1.6             | V <sub>2</sub> O <sub>5</sub> hollow spheres                                  | 3.5M ZnSO <sub>4</sub>                                               | 280 mA h g <sup>-1</sup> at 0.2 A g <sup>-1</sup>      | 82.5% after 6200 cycles at 10 A g <sup>-1</sup>                                                      |
| 2018 <sup>2</sup>      | 0.4 to 1.4             | Commercial V <sub>2</sub> O <sub>5</sub>                                      | 3M ZnSO <sub>4</sub>                                                 | 224 mA h g <sup>-1</sup> at 0.1 A g <sup>-1</sup>      | -                                                                                                    |
| 2017 <sup>3</sup>      | 0.2 to 1.6             | Porous V <sub>2</sub> O <sub>5</sub> microplates                              | 21M LiTFSI and 1M Zn (CF <sub>3</sub> SO <sub>3</sub> ) <sub>2</sub> | 238 mA h g <sup>-1</sup> at 0.05 A g <sup>-1</sup>     | 80% after 2000cycles at 2000 mA g <sup>-1</sup>                                                      |
| 2019 <sup>4</sup>      | 0.2 to 1.6             | V <sub>2</sub> O <sub>5</sub> nanopaper                                       | 2M ZnSO <sub>4</sub>                                                 | 375 mA h g <sup>-1</sup> at 0.5 A g <sup>-1</sup>      | 76.9% after 500 cycles at 10 A g <sup>-1</sup>                                                       |
| 2019 <sup>5</sup>      | 0.2 to 1.6             | Rod-like anhydrous V <sub>2</sub> O <sub>5</sub>                              | 3 M Zn(CF <sub>3</sub> SO <sub>3</sub> ) <sub>2</sub>                | 449.8 mA h g <sup>-1</sup> at 0.1 A g <sup>-1</sup>    | 86.8% after 2000 cycles at 2 A g <sup>-1</sup>                                                       |
| 2019 <sup>6</sup>      | 0.4 to 1.4             | Polycrystalline K <sub>0.25</sub> V <sub>2</sub> O <sub>5</sub> nanoparticles | 2M ZnSO <sub>4</sub>                                                 | 306 mA h g <sup>-1</sup> at 1 A g <sup>-1</sup>        | 83% after 50 cycles at 1 A g <sup>-1</sup>                                                           |
| 2019 <sup>7</sup>      | 0.2 to 1.6             | Zn/ V <sub>2</sub> O <sub>5</sub>                                             | 3M ZnSO <sub>4</sub> (V-3M-Nafion)-seperator                         | 510 mA h g <sup>-1</sup> at 0.25 A g <sup>-1</sup>     | 84% after 1300 cycles at 5 A g <sup>-1</sup>                                                         |
| 2019 <sup>8</sup>      | 0.2 to 1.6             | V <sub>2</sub> O <sub>5</sub> @PEDOT/CC nanosheet                             | 2.5M Zn(CF <sub>3</sub> SO <sub>3</sub> ) <sub>2</sub>               | 360 mA h g <sup>-1</sup> at 0.1 A g <sup>-1</sup>      | 97% after 600 cycles at 1 A g <sup>-1</sup> and 89% after 1000 cycles at 5 A g <sup>-1</sup>         |
| 2019 <sup>9</sup>      | 0.4 to 1.4             | K <sup>+</sup> intercalated V <sub>2</sub> O <sub>5</sub> nanorods            | 2M ZnSO <sub>4</sub>                                                 | 386 mA h g <sup>-1</sup> at 0.05 A g <sup>-1</sup>     | 96% after 1500 cycles at 8000 mA g <sup>-1</sup>                                                     |
| 2019 <sup>10</sup>     | 0.3 to 1.4             | Cu-V <sub>2</sub> O <sub>5</sub>                                              | 2M ZnSO <sub>4</sub>                                                 | 410 mA h g <sup>-1</sup> at 0.5 A g <sup>-1</sup>      | -                                                                                                    |
| 2019 <sup>11</sup>     | 0.4-1.6                | P- V <sub>2</sub> O <sub>5</sub>                                              | 3M Zn(CF <sub>3</sub> SO <sub>3</sub> ) <sub>2</sub>                 | 320mA h g <sup>-1</sup> at 0.1 mA g <sup>-1</sup>      | -                                                                                                    |
| 2019 <sup>12</sup>     | 0.4-1.6                | V <sub>2</sub> O <sub>5</sub> /CNT                                            | 1M ZnSO <sub>4</sub>                                                 | 312 mA h g <sup>-1</sup> at 1 A g <sup>-1</sup>        | 81% after 2000 cycles at 1 A g <sup>-1</sup>                                                         |
| <b>This work</b>       | <b>0.2 to 1.4</b>      | <b>V<sub>2</sub>O<sub>5</sub>@V<sub>2</sub>C</b>                              | <b>2.5M ZnSO<sub>4</sub></b>                                         | <b>397 mA h g<sup>-1</sup> at 0.5 A g<sup>-1</sup></b> | <b>84.5% after 100 cycles at 0.5A g<sup>-1</sup> and 87% after 2000 cycles at 4 A g<sup>-1</sup></b> |

## References

- 1 H. Qin, L. Chen, L. Wang, X. Chen and Z. Yang, *Electrochim. Acta*, 2019, **306**, 307–316.
- 2 J. Zhou, L. Shan, Z. Wu, X. Guo, G. Fang and S. Liang, *Chem. Commun.*, 2018, **54**, 4457–4460.
- 3 P. Hu, M. Yan, T. Zhu, X. Wang, X. Wei, J. Li, L. Zhou, Z. Li, L. Chen and L. Mai, *ACS Appl. Mater. Interfaces*, 2017, **9**, 42717–42722.
- 4 Y. Li, Z. Huang, P. K. Kalambate, Y. Zhong, Z. Huang, M. Xie, Y. Shen and Y. Huang, *Nano Energy*, 2019, **60**, 752–759.
- 5 W. Zhou, J. Chen, M. Chen, X. Xu, Q. Tian, J. Xu and C. P. Wong, *RSC Adv.*, 2019, **9**, 30556–30564.
- 6 S. Li, M. Chen, G. Fang, L. Shan, X. Cao, J. Huang, S. Liang and J. Zhou, *J. Alloys Compd.*, 2019, **801**, 82–89.
- 7 M. Ghosh, V. Vijayakumar and S. Kurungot, *Energy Technol.*, 2019, **7**, 1–10.
- 8 D. Xu, H. Wang, F. Li, Z. Guan, R. Wang, B. He, Y. Gong and X. Hu, *Adv. Mater. Interfaces*, 2019, **6**, 1–8.
- 9 S. Islam, M. H. Alfaruqi, D. Y. Putro, V. Soundharrajan, B. Sambandam, J. Jo, S. Park, S. Lee, V. Mathew and J. Kim, *J. Mater. Chem. A*, 2019, **7**, 20335–20347.
- 10 Y. Yang, Y. Tang, S. Liang, Z. Wu, G. Fang, X. Cao, C. Wang, T. Lin, A. Pan and J. Zhou, *Nano Energy*, 2019, **61**, 617–625.
- 11 Y. Ding, Y. Peng, W. Chen, Y. Niu, S. Wu, X. Zhang and L. Hu, *Appl. Surf. Sci.*, 2019, **493**, 368–374.
- 12 B. Yin, S. Zhang, K. Ke, T. Xiong, Y. Wang, B. K. D. Lim, W. S. V. Lee, Z. Wang and J. Xue, *Nanoscale*, 2019, **11**, 19723–19728.
